# Supplementary material for: Size control of noble metal clusters and metallic heterostructures through the reduction kinetics of metal precursors
Source: Royal Society of Chemistry journal article supplement (doi:10.1039/c4nr03045a), 2014-01-01
Supplement: c4nr03045a1.pdf [file c4nr03045a1.pdf]

[Pt(II)(NH<sub>3</sub>)<sub>4</sub>](OC<sub>2</sub>H<sub>3</sub>O<sub>2</sub>)<sub>2</sub> reduced

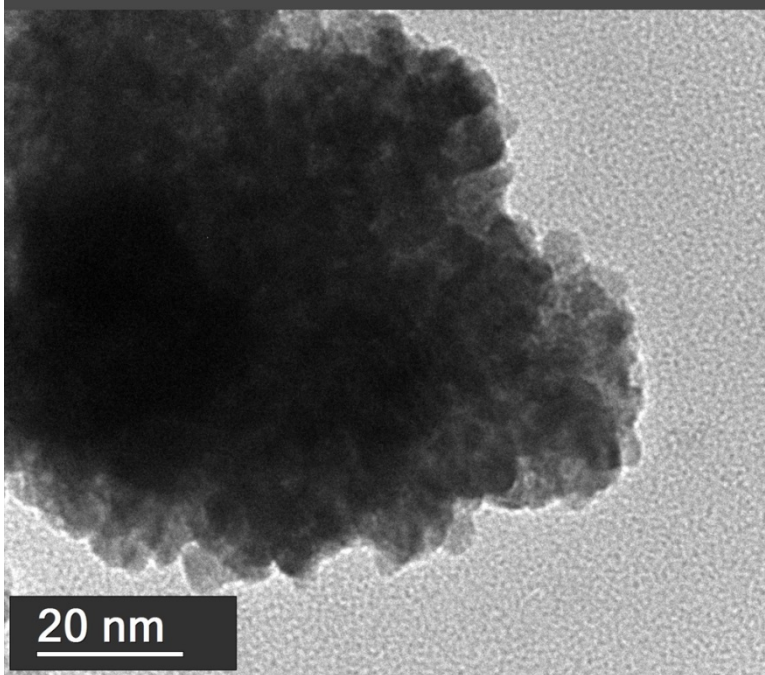

H<sub>2</sub>PtCl<sub>6</sub> reduced

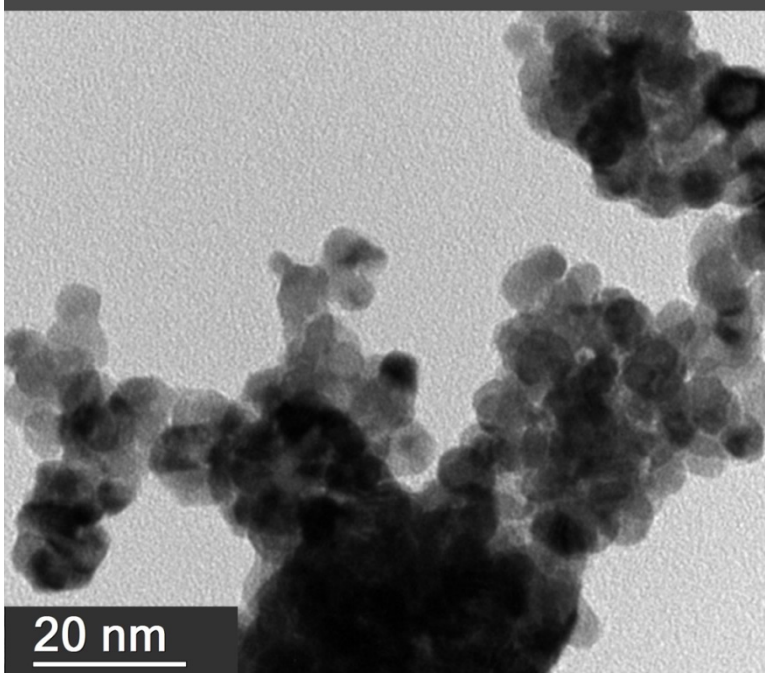

$[\text{EA}_2\text{Pt(IV)}](\text{OH})_6$  reduced

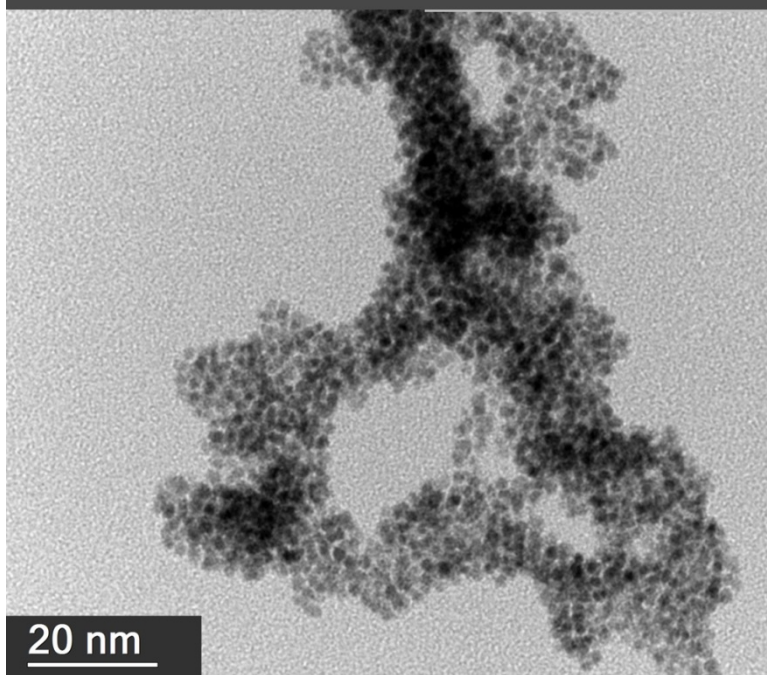

$(\text{NH}_3)_4\text{Pt(II)}(\text{HCO}_3)_2$  reduced

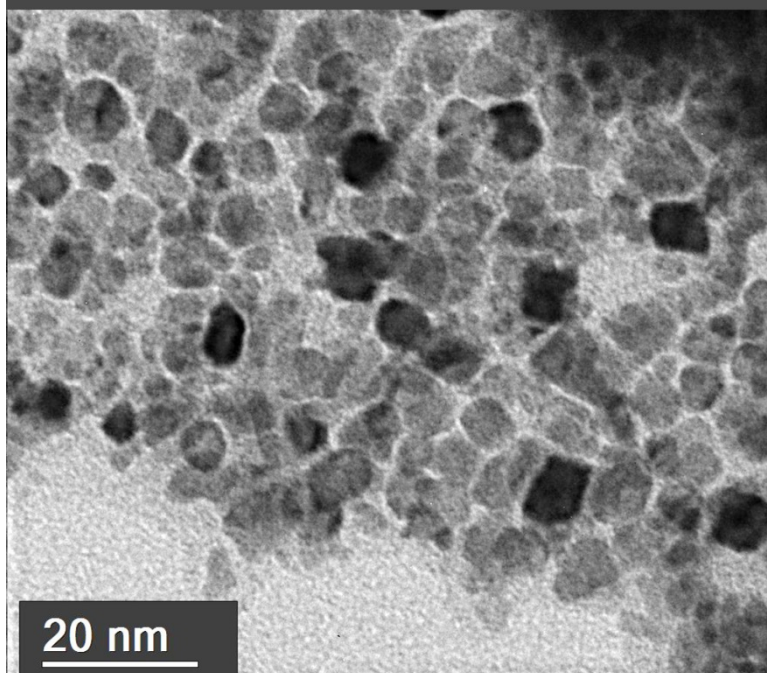

[ETA<sub>4</sub>Pt(II)](CO<sub>3</sub>) reduced

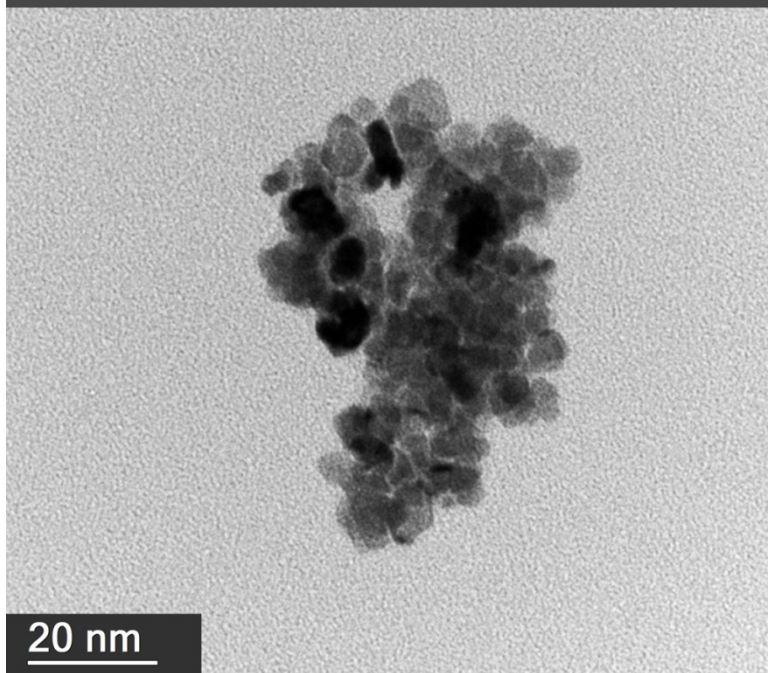

ETA<sub>2</sub>[Pt(IV)(OH)<sub>6</sub>] reduced

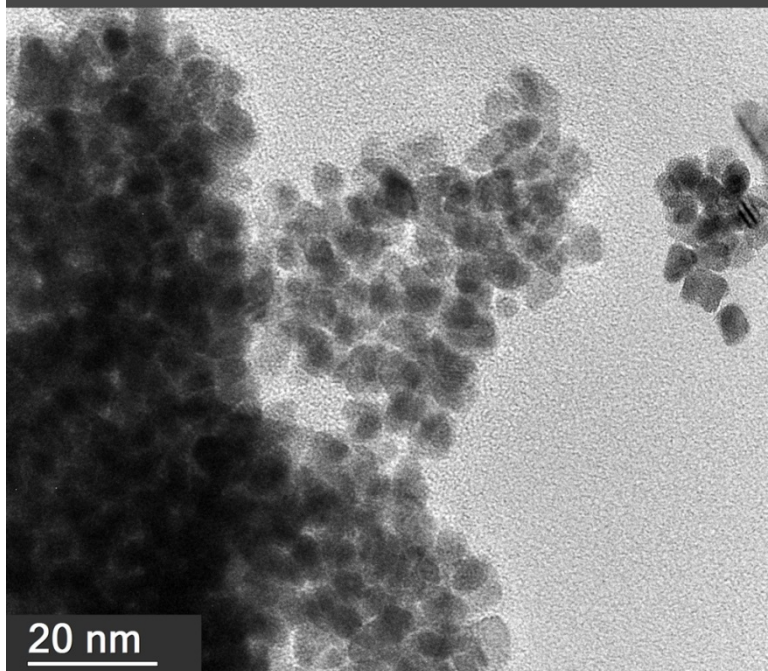



$\text{H}_2\text{IrCl}_6$  reduced

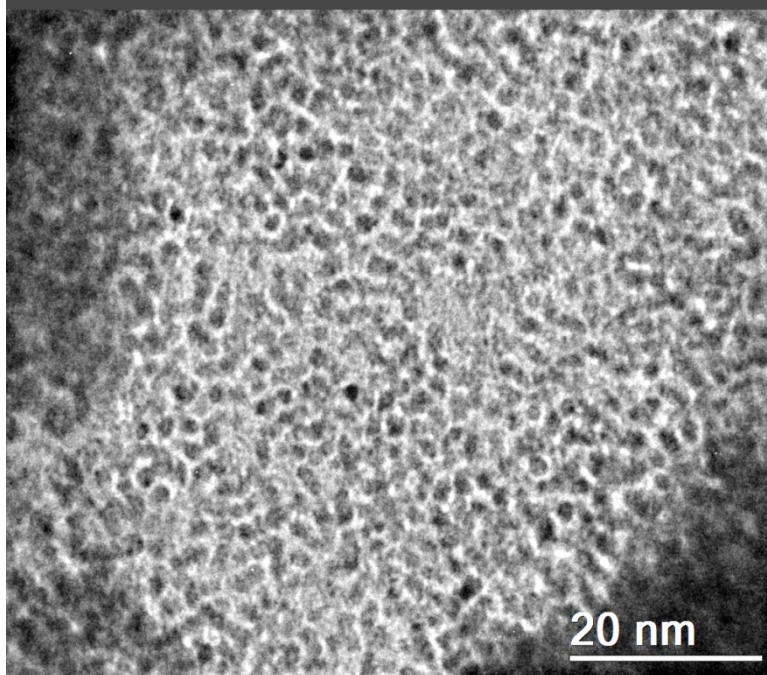

$\text{IrC}_6\text{H}_9\text{O}_6$  reduced

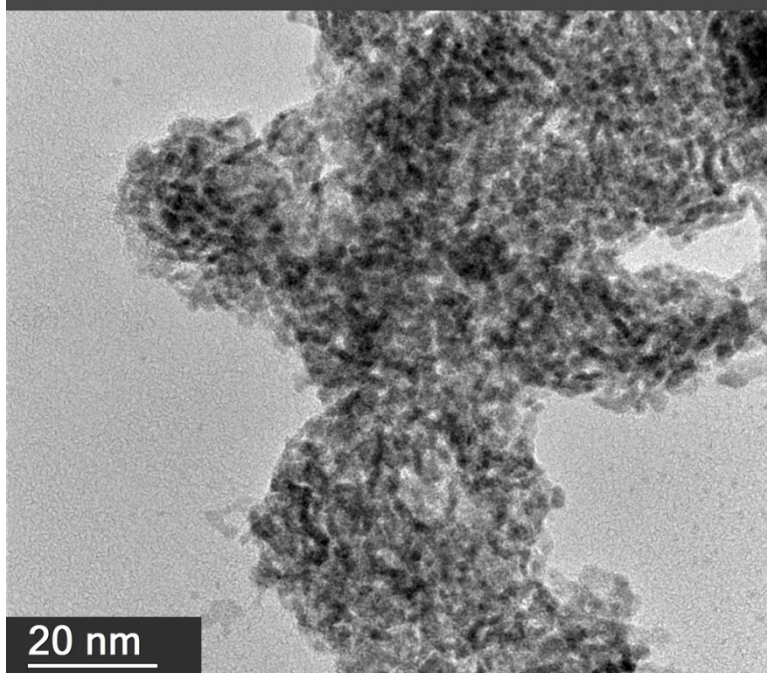

Supplementary Figure 1. Pt and Ir seeds prepared by polyol reduction method. Some particles are strongly aggregated

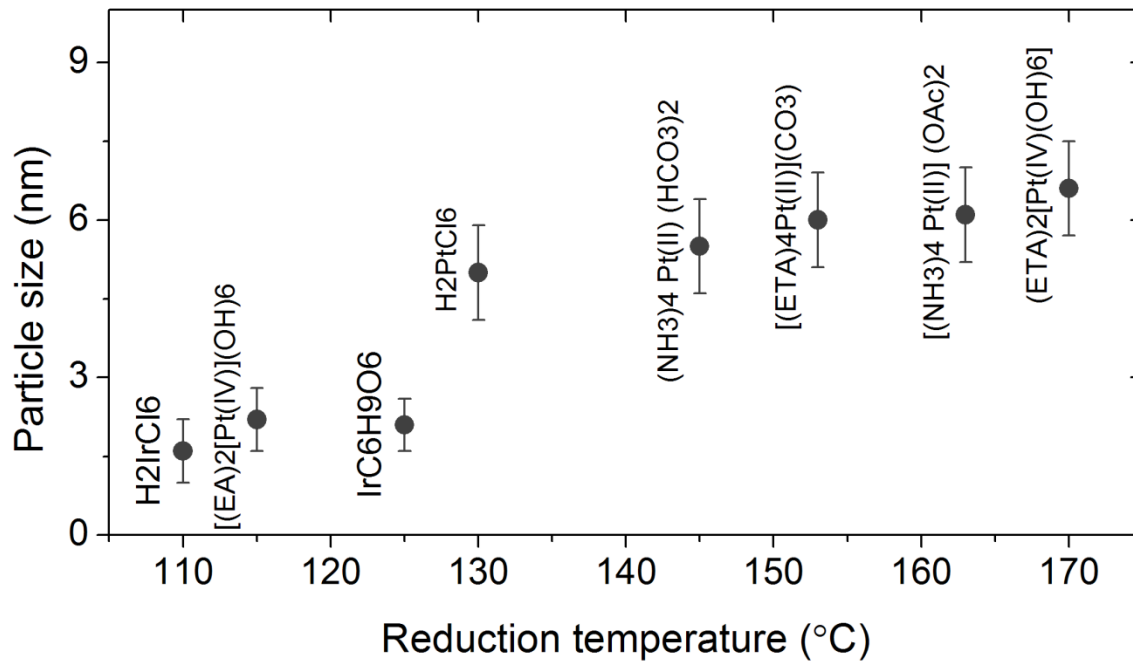

Supplementary Figure 2. The size chart of the Pt and Ir seeds prepared by polyol reduction method

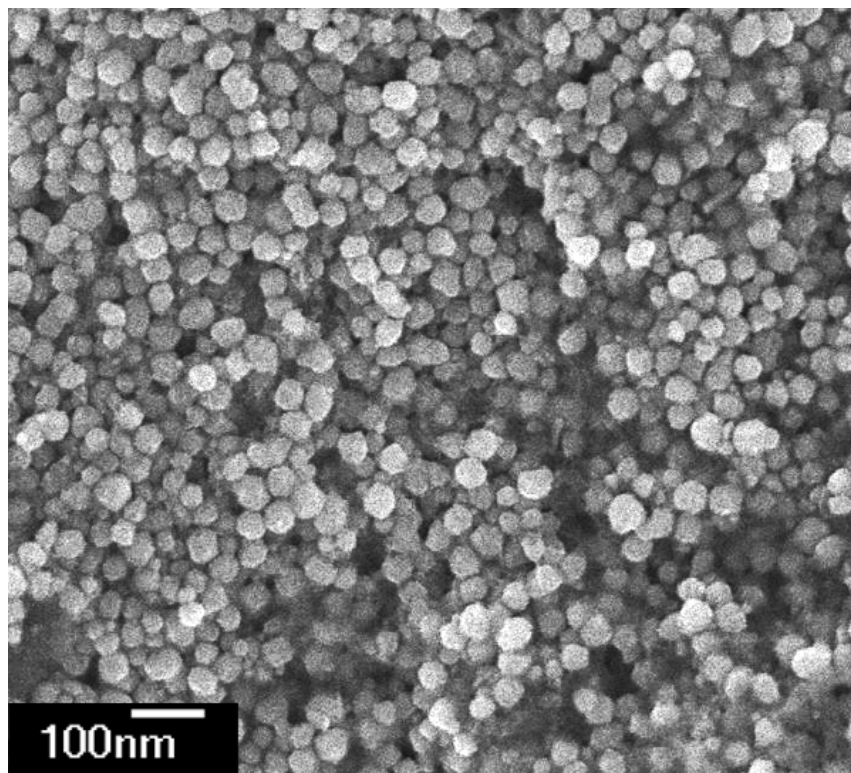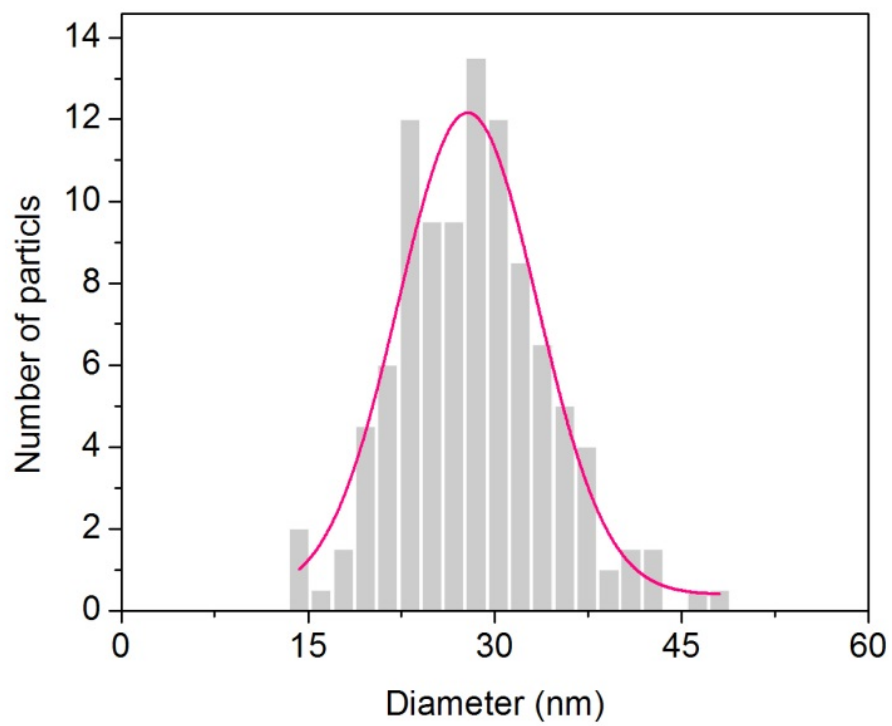

Supplementary Figure 2. Top – Ni core particles prepared via ‘seeding’ method with the  $(EA)_2[Pt(II)(OH)_6]$  precursor; and bottom – their Gaussian fitted size distribution

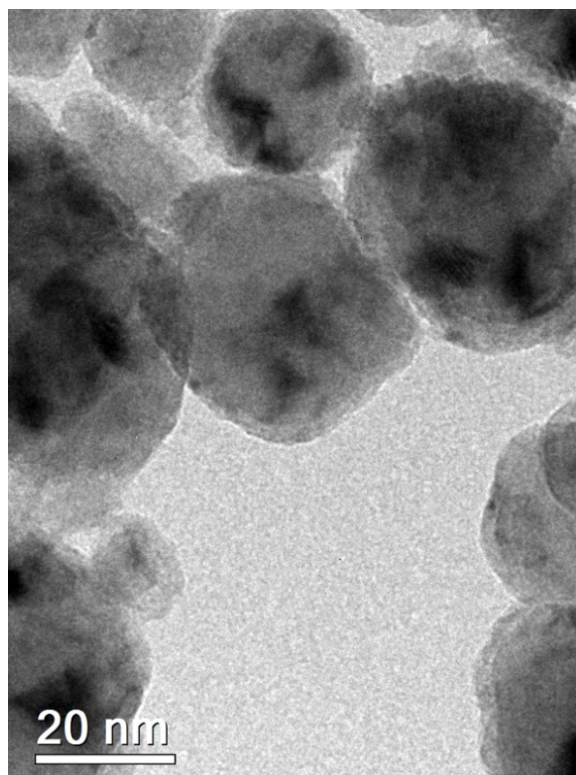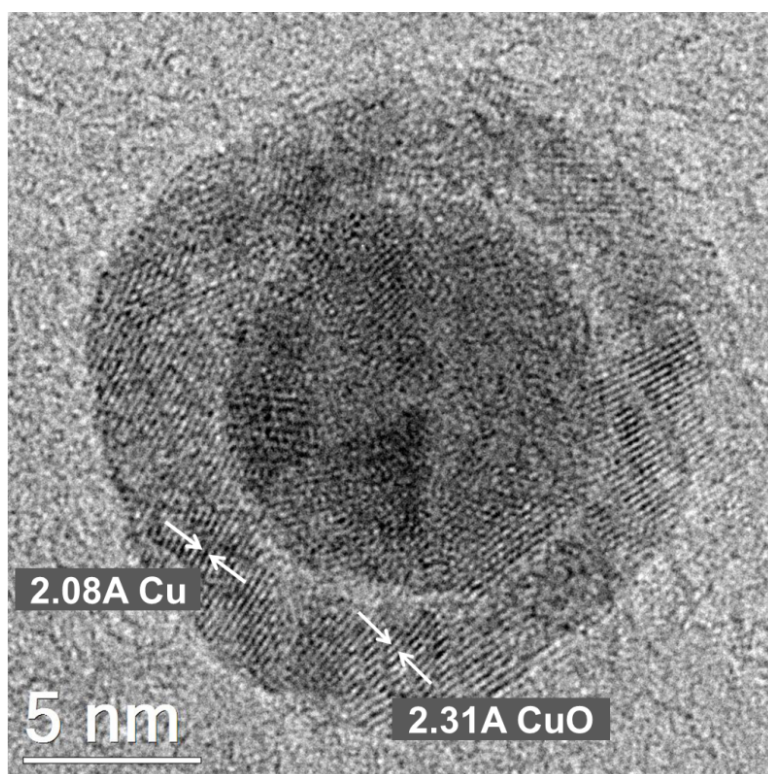



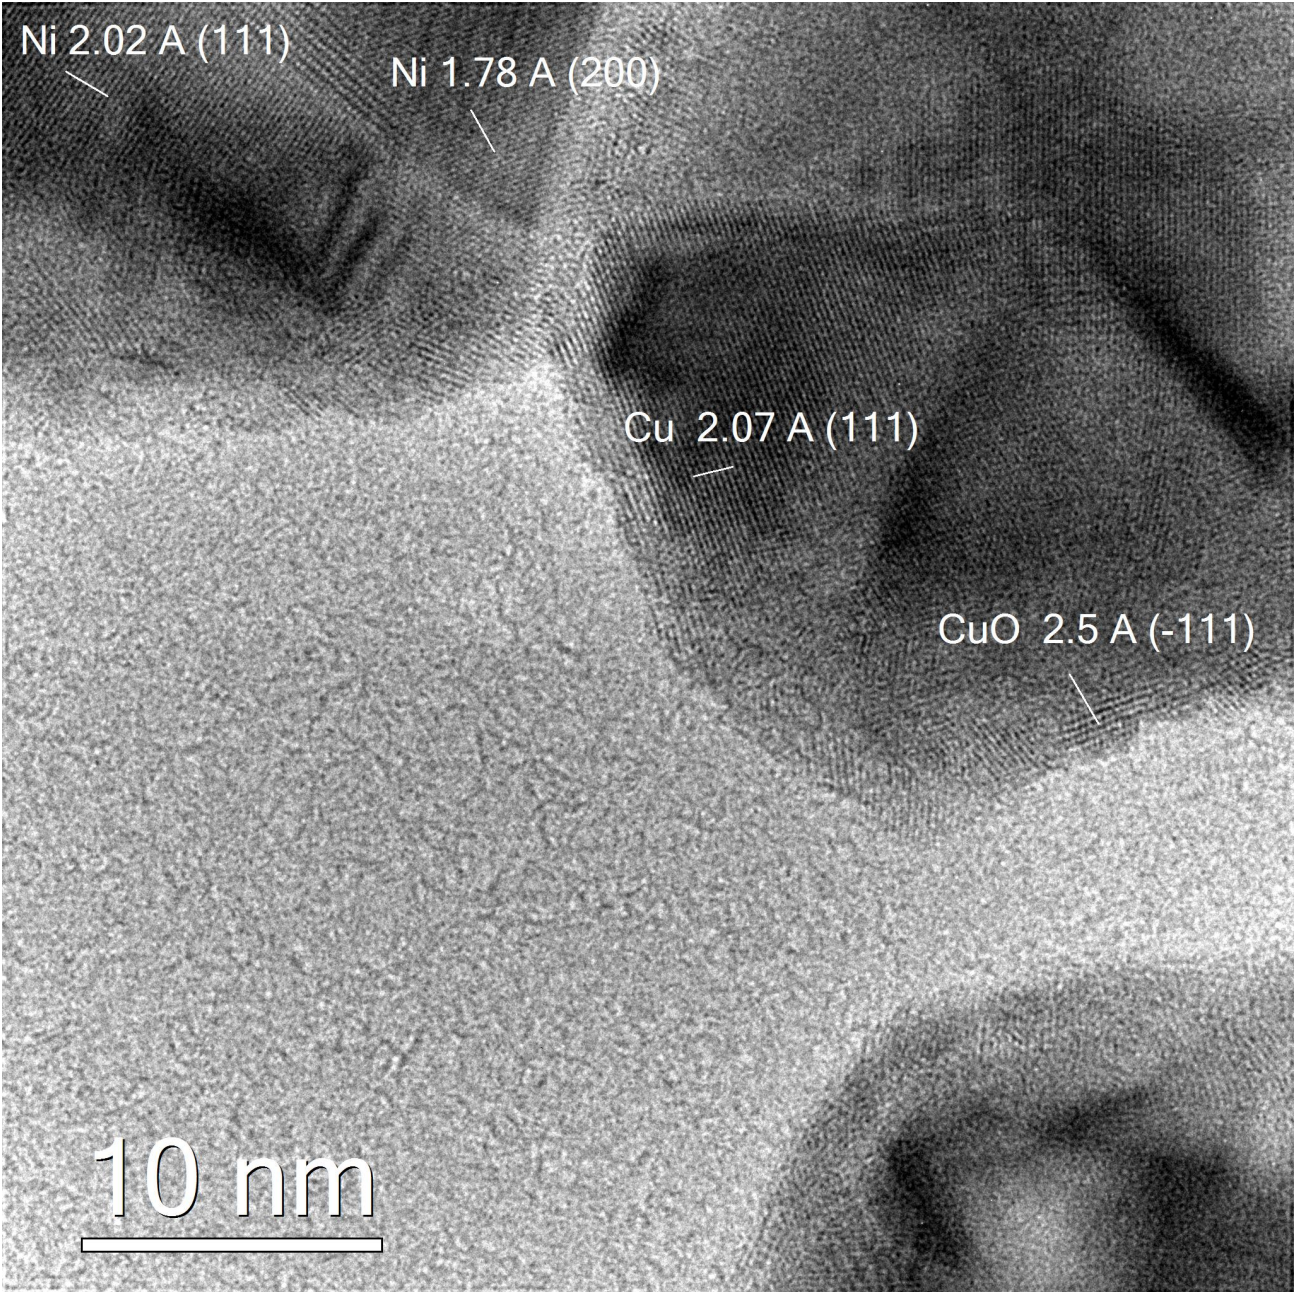



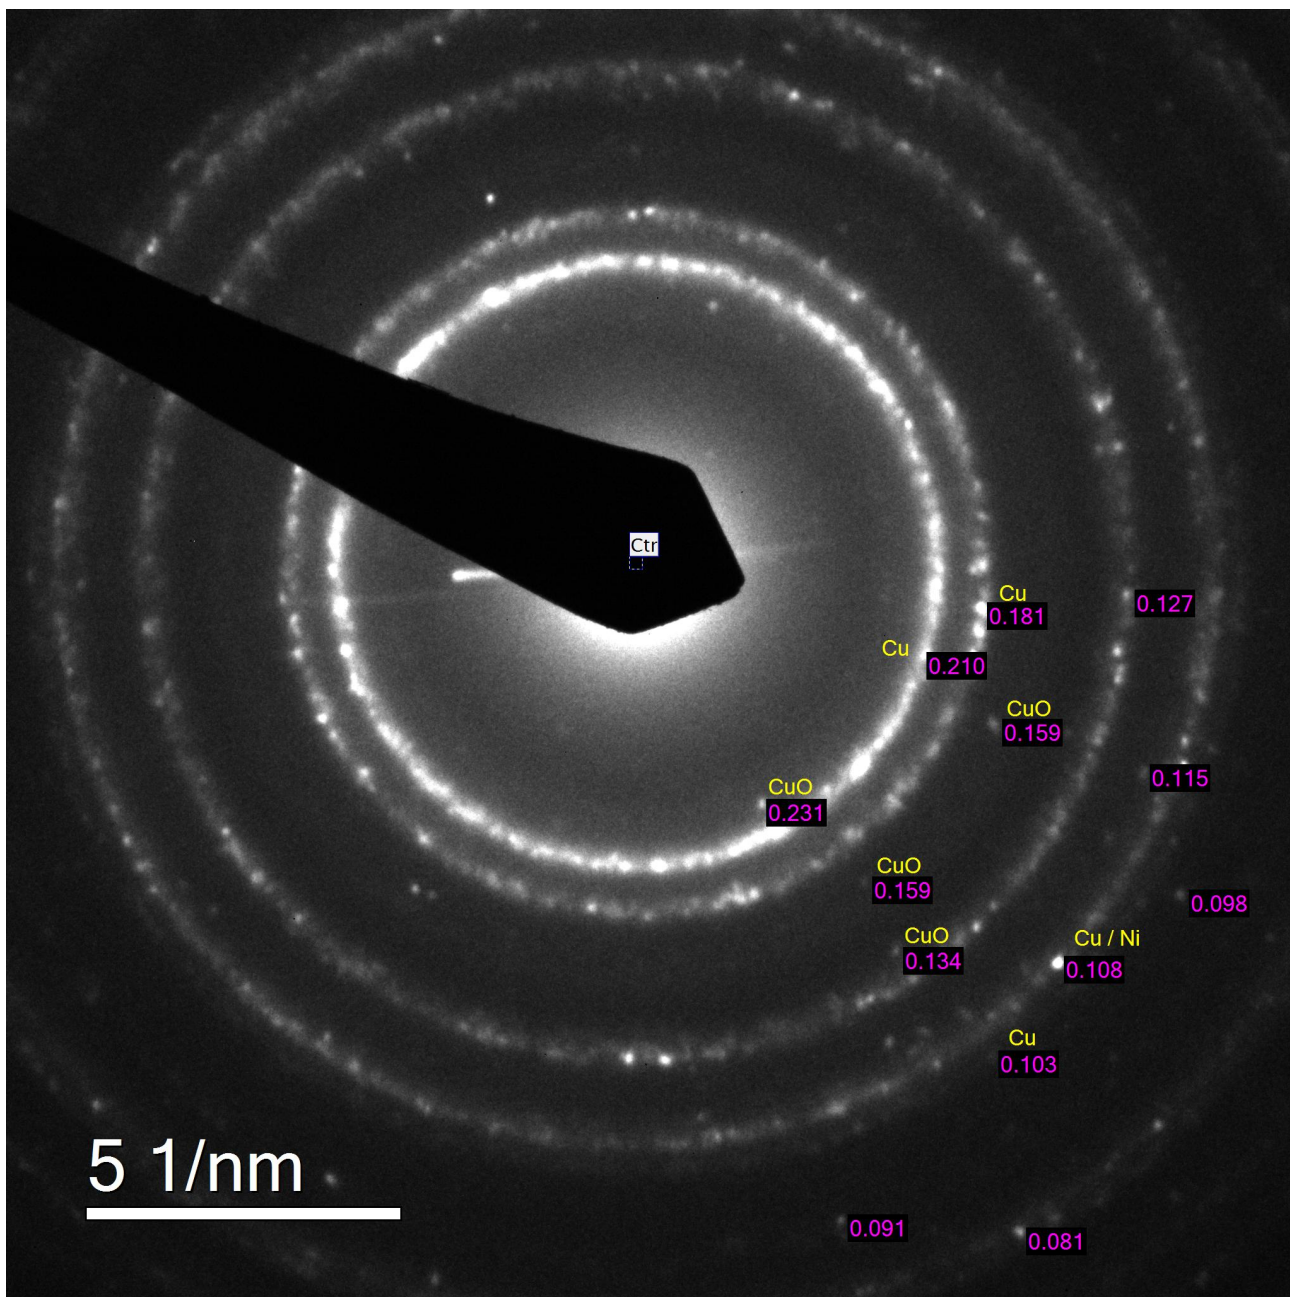

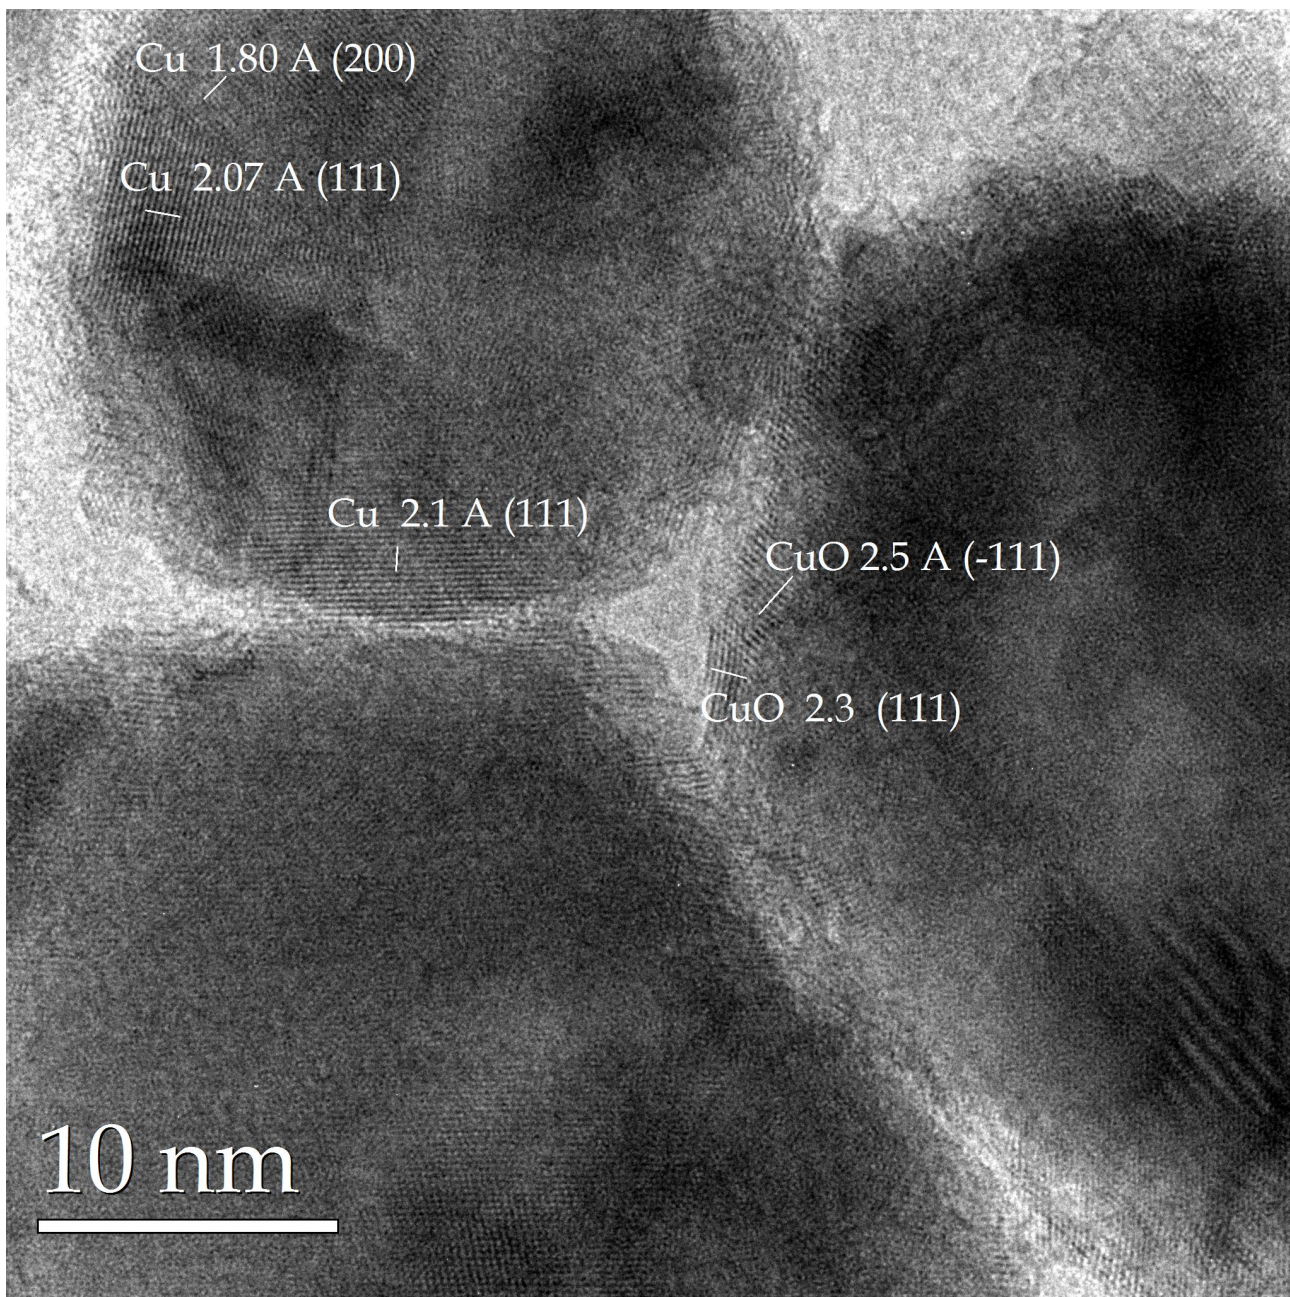



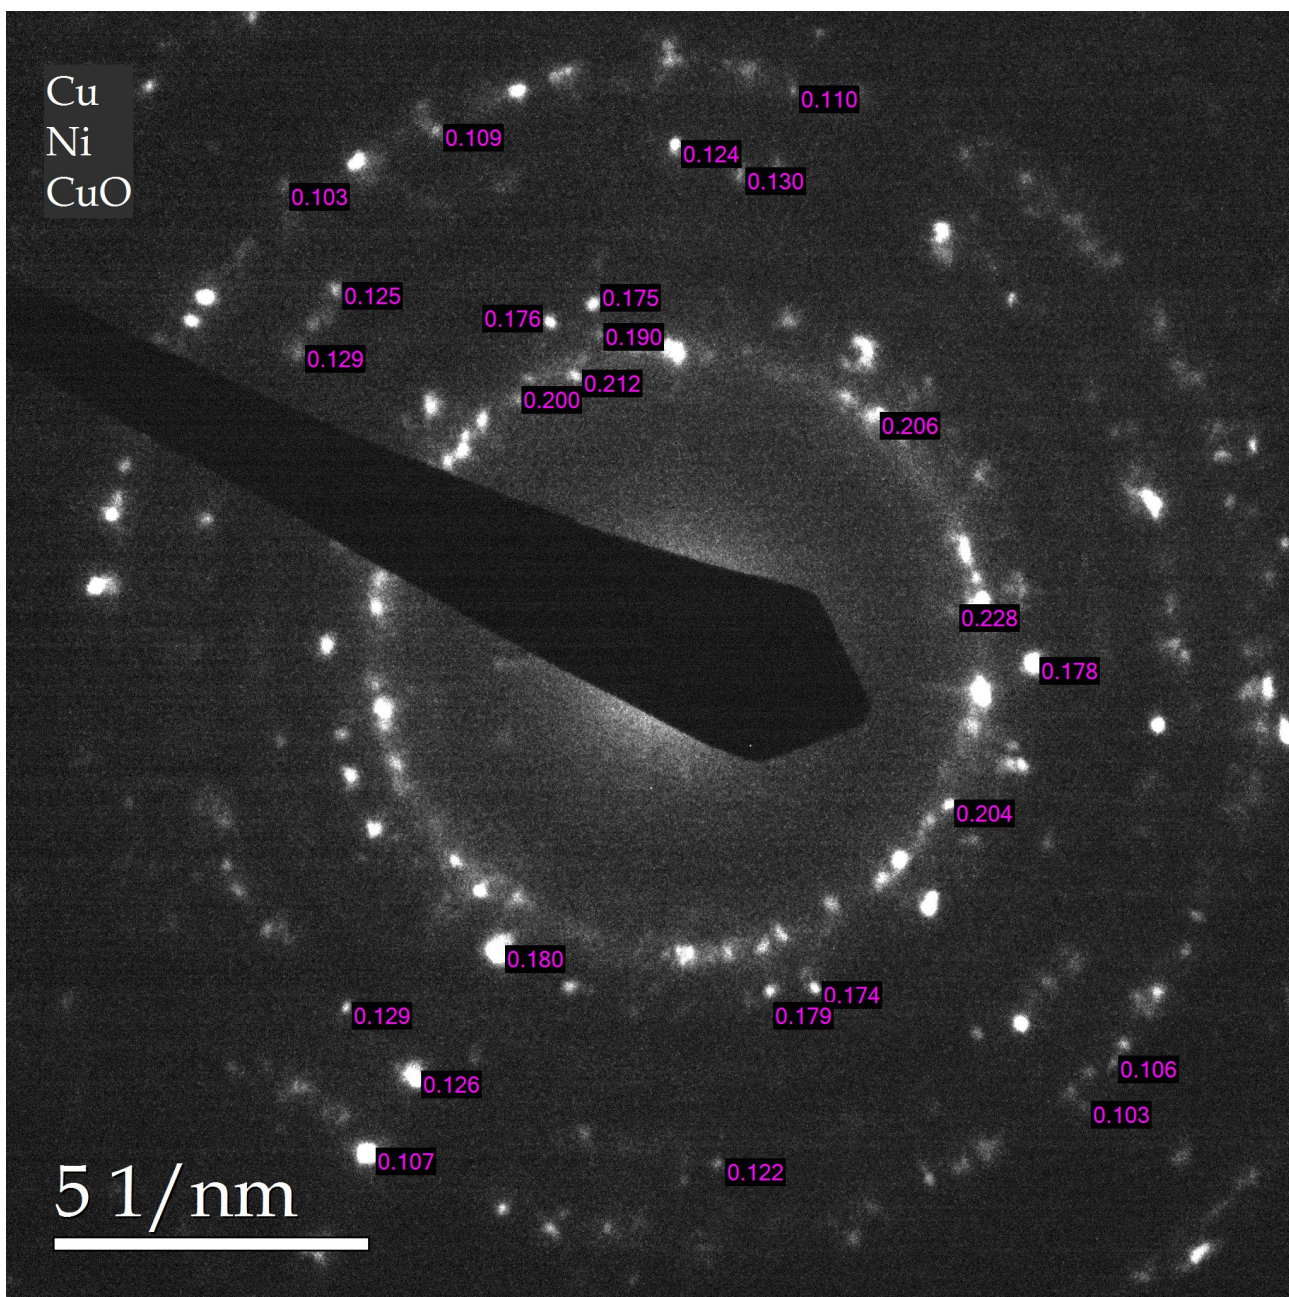

Supplementary Figure 3. TEM, high-resolution TEM and selected area electron diffraction of the Ni core particles coated with the 2–4 nm continuous copper shell, micrographs indicate Cu shell and oxidized copper patches were formed



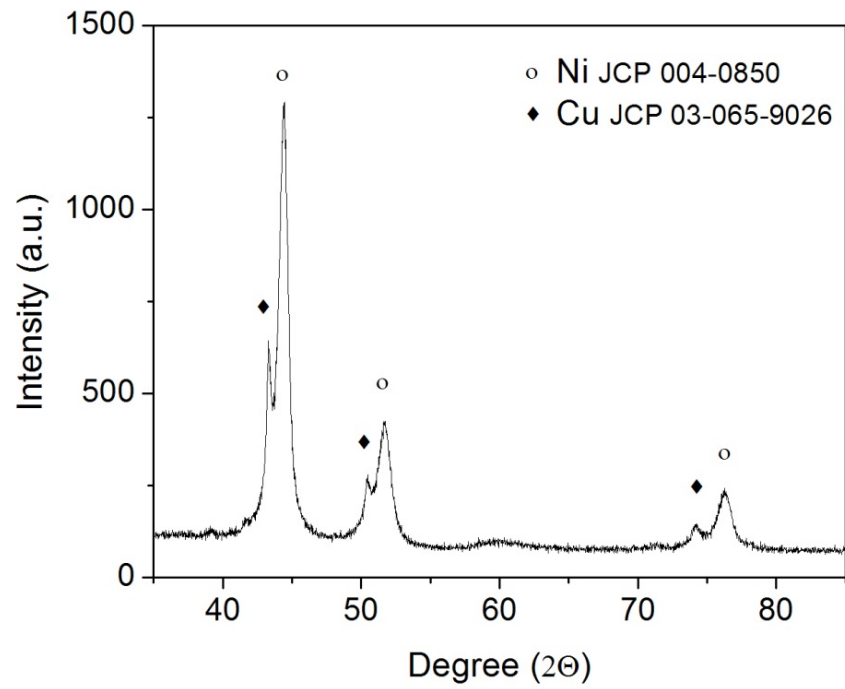

Supplementary Figure 4. XRD pattern of Ni/Cu core-shell particles prepared via 'seeding' method.
